# Supplementary material for: A halide perovskite as a catalyst to simultaneously achieve efficient photocatalytic CO2 reduction and methanol oxidation
Source: Royal Society of Chemistry journal article supplement (doi:10.1039/d0cc01176b), 2020-01-01
Supplement: d0cc01176b1.pdf [file d0cc01176b1.pdf]

## ***Electronic supplementary information***

### **Halide perovskite as catalyst to simultaneously achieve efficient photocatalytic CO<sub>2</sub> reduction and methanol oxidation**

Guang-Xing Dong,<sup>‡a</sup> Wen Zhang,<sup>‡a</sup> Yan-Fei Mu,<sup>a</sup> Ke Su,<sup>a</sup> Min Zhang<sup>\*ab</sup> and Tong-Bu Lu<sup>a</sup>

<sup>a</sup> MOE International Joint Laboratory of Materials Microstructure, Institute for New Energy Materials and Low Carbon Technologies, School of Materials Science and Engineering, Tianjin University of Technology, Tianjin 300384, China

E-mail: zm2016@email.tjut.edu.cn.

<sup>b</sup> Tianjin Key Laboratory of Organic Solar Cells and Photochemical Conversion, School of Chemistry and Chemical Engineering Department, Tianjin University of Technology, Tianjin 300384, China.

<sup>‡</sup> These authors contributed equally to this work.

## Experimental Section

**Materials:** Cesium bromide ( $\text{CsBr}$ ,  $\geq 99.9\%$ ) and lead bromide ( $\text{PbBr}_2$ ,  $\geq 99.9\%$ ) were purchased from Xi'an Polymer Light Technology Corp. Cobalt bromide ( $\text{CoBr}_2$ , anhydrous, 97%), iron bromide ( $\text{FeBr}_3$ , anhydrous, 98%) and nickel bromide ( $\text{NiBr}_2$ , anhydrous, 99%) were purchased from Alfa Aesar. *N,N*-dimethylformamide (DMF, HPLC,  $\geq 99.9\%$ ), hydrobromic acid (HBr, 48 wt% solution in water), methanol (HPLC,  $\geq 99.9\%$ ), acetonitrile (Extra dry with molecular sieves,  $\text{Water} \leq 50$  ppm, in resealable bottle,  $\geq 99.9\%$ ),  $^{13}\text{CO}_2$  and  $^{13}\text{CH}_3\text{OH}$  were purchased from Sigma-Aldrich. All chemicals were purchased from commercial sources and used without further treatments. The pure  $\text{CsPbBr}_3$  nanocrystals were prepared by conventional hot injection approach.<sup>S1</sup>

**Synthesis of  $\text{CsPbBr}_3/\text{Cs}_4\text{PbBr}_6$  (PNC) nanocomposites:** 1 M  $\text{PbBr}_2$  and 1 M  $\text{CsBr}$  were respectively ultrasonically dissolved in hydrobromic acid solution to prepare solutions **A** and **B**. Solution **A** (120  $\mu\text{L}$ ) was added into DMF (1 mL) and stirred vigorously in ice-bath to form  $\text{PbBr}_2$  precursor. Then solution **B** (120  $\mu\text{L}$ ) was added into  $\text{PbBr}_2$  precursor solution drop by drop and stirred in ice-bath for 3 h. Finally, dried  $\text{CsPbBr}_3/\text{Cs}_4\text{PbBr}_6$  nanocrystals were obtained by drying at 80 °C in vacuum for 6 h after centrifuging 12000 rpm for 3 minutes, and the powder was stored in vacuum drier for further use.

**Synthesis of  $\text{Co}_{x\%}@\text{CsPbBr}_3/\text{Cs}_4\text{PbBr}_6$  ( $\text{Co}_{x\%}@\text{PNC}$ ) nanocomposites:** 0.01 M  $\text{CoBr}_2$  was ultrasonically dissolved in DMF to prepare solution **C**. Solution **A** (120  $\mu\text{L}$ ) was added into a certain amount of DMF (**Table S1**) and stirred vigorously in ice-bath to form  $\text{PbBr}_2$  precursor, then a certain amount of solution **C** (**Table S1**) was added into  $\text{PbBr}_2$  precursor. After stirring 2 minutes, solution **B** (120  $\mu\text{L}$ ) was added into  $\text{PbBr}_2$  precursor solution drop by drop and stirred in ice-bath for 3 h. Finally, dried  $\text{Co}_{x\%}@\text{PNC}$  nanocomposites were obtained by drying at 80 °C in vacuum for 6 h after centrifuging 12000 rpm for 3 minutes and washing with DMF, and the powders were stored in vacuum drier for further use. The accurate mass fraction of Co element in  $\text{Co}_{0.5\%}@\text{PNC}$ ,  $\text{Co}_{1\%}@\text{PNC}$  and  $\text{Co}_{2\%}@\text{PNC}$  were measured by ICP-MS as 0.015%, 0.047% and 0.053%, respectively.

**Table S1** The preparation formulas of PNC nanocomposites with different metal ion doping.

| Doping concentration (M) | DMF ( $\mu\text{L}$ ) | Solution A ( $\mu\text{L}$ ) | Solution B ( $\mu\text{L}$ ) | Solution C ( $\mu\text{L}$ ) |
|--------------------------|-----------------------|------------------------------|------------------------------|------------------------------|
| 0.5%                     | 940                   | 120                          | 120                          | 60                           |
| 1%                       | 880                   | 120                          | 120                          | 120                          |
| 2%                       | 760                   | 120                          | 120                          | 240                          |
| 3%                       | 640                   | 120                          | 120                          | 360                          |

**Characterizations methods.** X-ray diffraction (XRD) patterns of PNC and  $\text{Co}_{x\%}\text{@PNC}$  catalysts were collected on a Rigaku diffractometer (SmartLab, 9 kW) by Cu  $\text{K}\alpha$  radiation ( $\lambda=0.15418$  nm) with a scan range of  $5^\circ$ -  $60^\circ$  and a step size of  $0.01^\circ$ . UV-vis DRS spectra were measured with test sample preparation by grind catalyst (5 mg) and Barium sulfate (300 mg) thoroughly on Lambda 750 UV/VIS/NIR spectrophotometer (Perkin Elmer). The steady-state photoluminescence spectrum (PL) were collected using a F-7000 fluorescence spectrophotometer (Hitachi) under excitation at 400 nm. The time-resolved fluorescence measurements were detected with a FLS-1000 steady state and transient state fluorescence spectrometer (Edinburgh Instruments Ltd.). Excitation wavelength: 400 nm; detection wavelength: 520 nm. Transmission electron microscopy (TEM) and High-Resolution Transmission Electron Microscopy (HRTEM) images were recorded on Tecnai G2 Spirit Twin and Talos F200 X transmission electron microscope (FEI), respectively. The gaseous reaction products measurements using GC-2014 Gas Chromatograph with GC-TCD and GC-FID instruments (Shimadzu), and the liquid phase products analyzed by ECO IC (Metrohm). The  $^{13}\text{C}$  NMR spectra of the liquid product obtained from the reaction with  $^{13}\text{CO}_2$  and  $^{13}\text{CH}_3\text{OH}$  were collected on AVANCE III HD 400 MHz Digital NMR spectrometer (Bruker).

**Photocatalytic Experiments:** The  $\text{CO}_2$  reduction and  $\text{CH}_3\text{OH}$  oxidation tests were

carried out in a 12 mL sealed Pyrex bottle with 5 mL acetonitrile, 15  $\mu\text{L}$  distilled water and 15  $\mu\text{L}$  methanol, then 4 mg photocatalyst were added into the reaction system above. The reaction system was irradiated under 300 W Xe-lamp with the light intensity of  $100 \text{ mW cm}^{-2}$  at room temperature for 15 h after degas with  $\text{CO}_2$  to remove  $\text{O}_2$ .

**Photoelectrochemical Experiments:** All the photoelectrochemical characterizations were performed on the CHI760E electrochemical workstation in a 3-electrode configuration with FTO glass ( $0.5 \text{ m}^2$ ) attached with catalyst, Pt sheet and Ag/AgCl (in 3 M KCl) as the working, counter and reference electrodes, respectively. The acetonitrile with 0.1 M tetrabutylammonium hexafluorophosphate ( $\text{TBAPF}_6$ ) was filled in the cell as electrolyte. The light source and light density and test conditions were consistent with that in the photocatalytic  $\text{CO}_2$  reduction test.

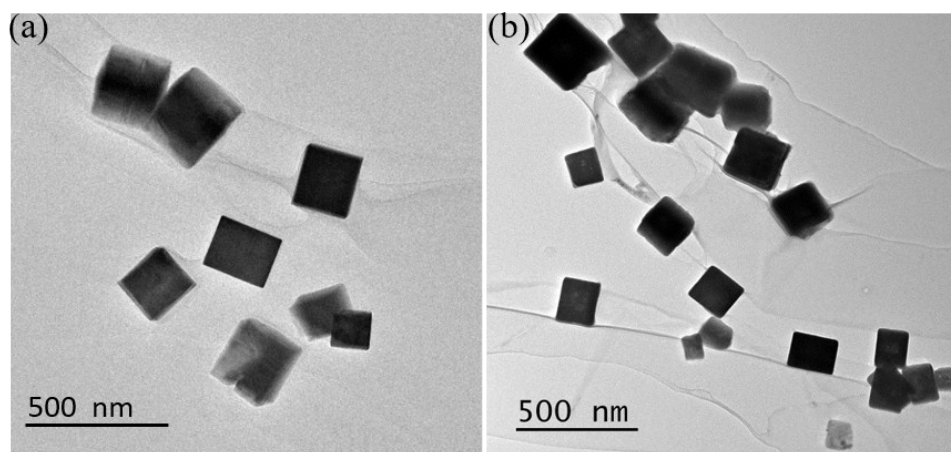

**Fig. S1** TEM images of (a) PNC and (b) Co<sub>1%</sub>@PNC nanocomposites.

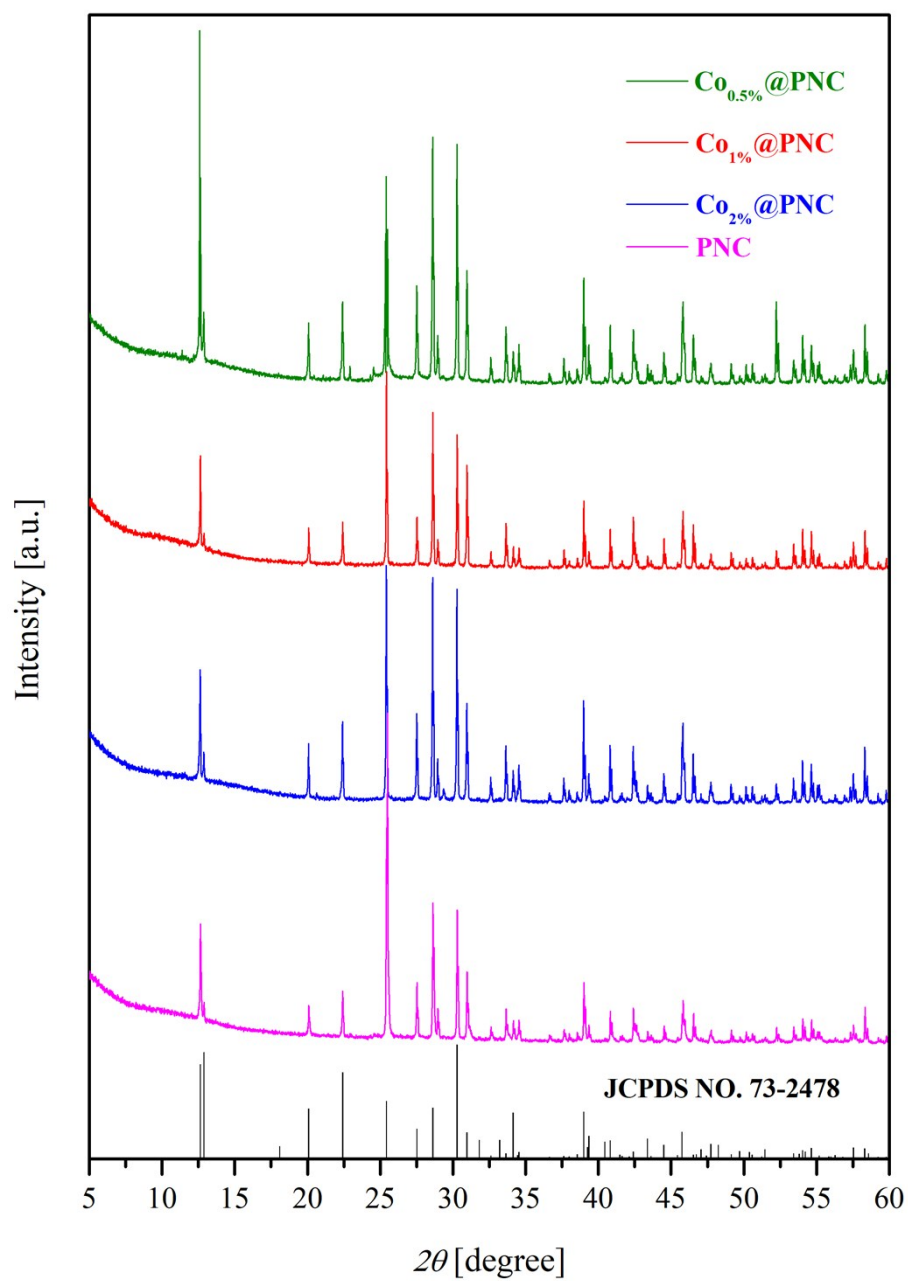

**Fig. S2** XRD patterns of the PNC nanocomposites with different Co doping concentrations.

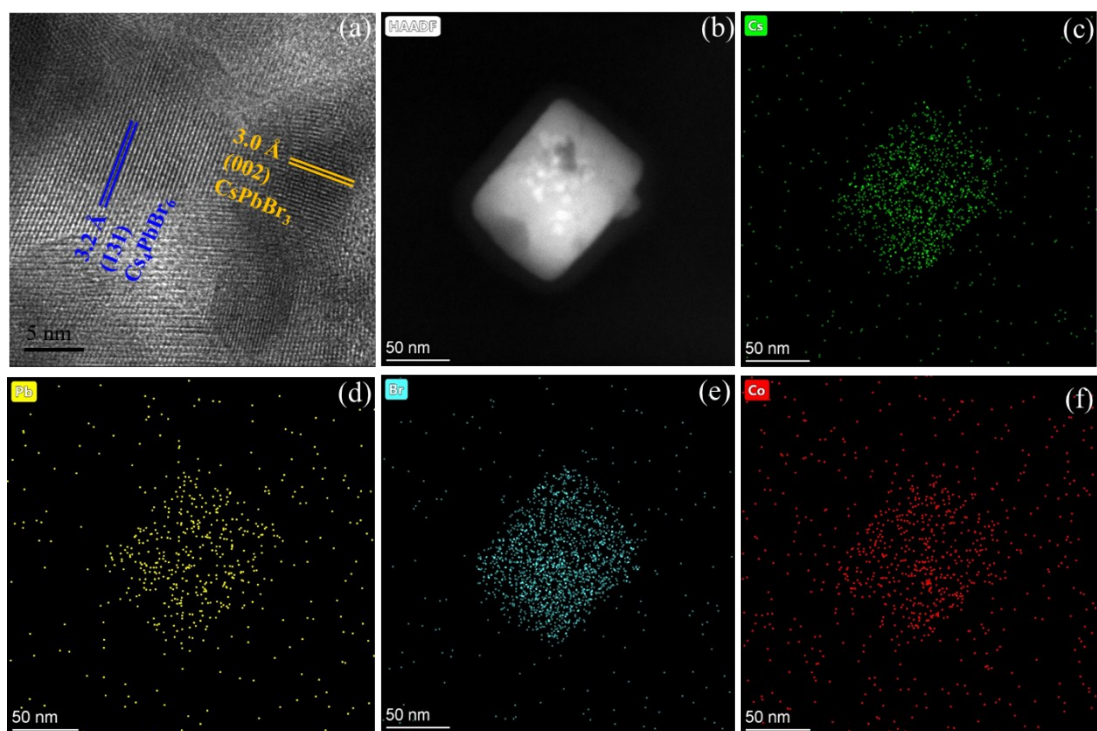

**Fig. S3** (a) HRTEM image with lattice spacing of CsPbBr<sub>3</sub> (orange) and Cs<sub>4</sub>PbBr<sub>6</sub> (blue). (b) TEM image, and (c-f) elemental mappings for Co<sub>1%</sub>@CsPbBr<sub>3</sub>/Cs<sub>4</sub>PbBr<sub>6</sub>.

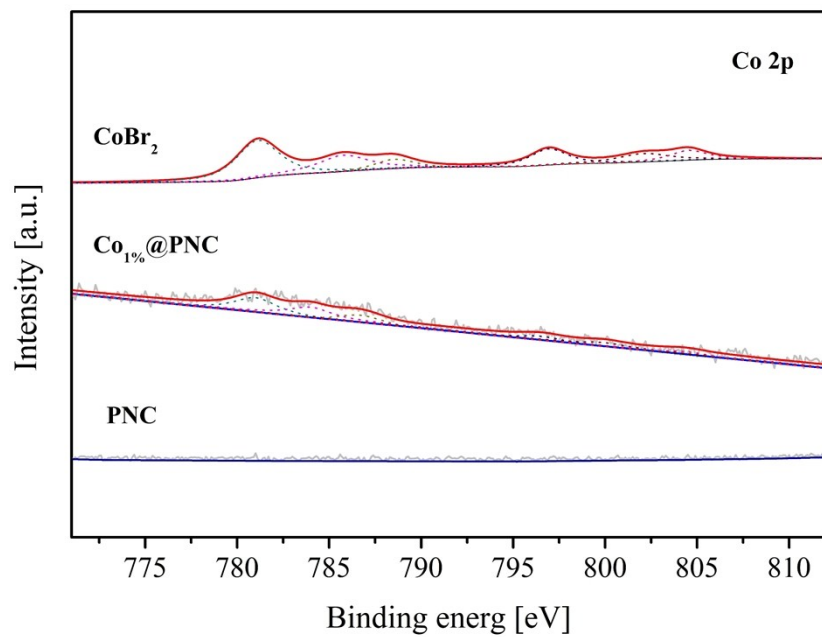

**Fig. S4** High resolution XPS plots of Co 2p for CoBr<sub>2</sub>, Co<sub>1%</sub>@PNC and PNC samples.



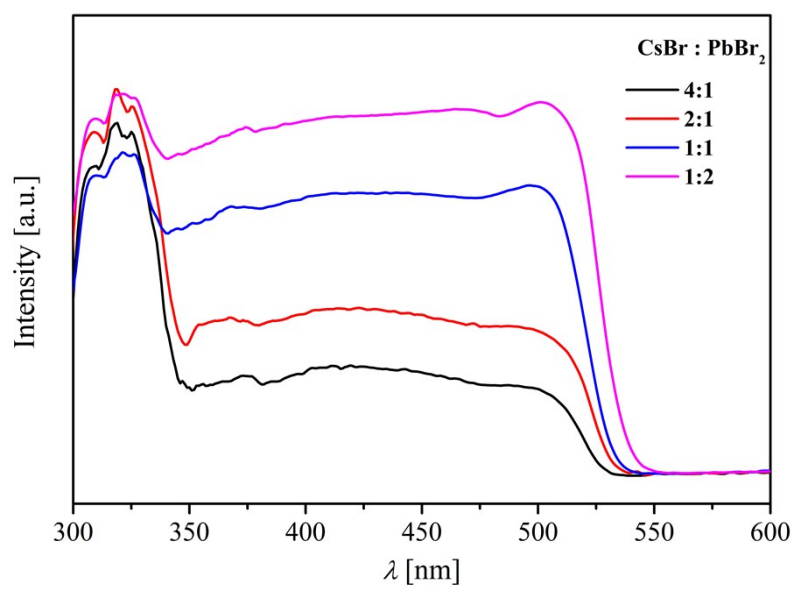

**Fig. S5** UV/Vis diffuse reflectance spectra of PNC with different feed ratios of PbBr<sub>2</sub> and CsBr.

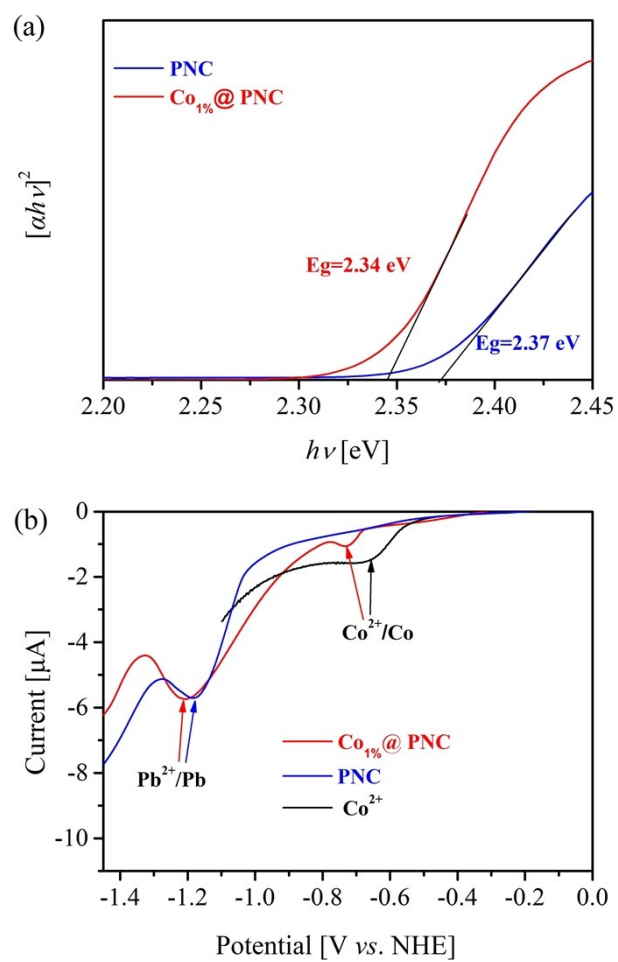

**Fig. S6** (a) Tauc plots of PNC and  $\text{Co}_{1\%}\text{@PNC}$ . (b) LSV curves of PNC,  $\text{Co}_{1\%}\text{@PNC}$  and free  $\text{Co}^{2+}$  in water under identical conditions.

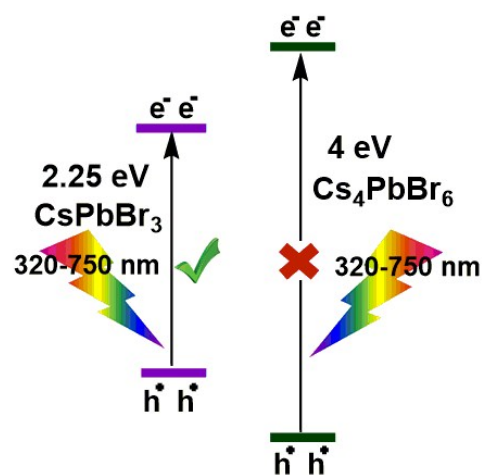

**Fig. S7** Schematic illustration of band structures for  $\text{CsPbBr}_3$  and  $\text{Cs}_4\text{PbBr}_6$  according to the reported results.<sup>S2</sup>

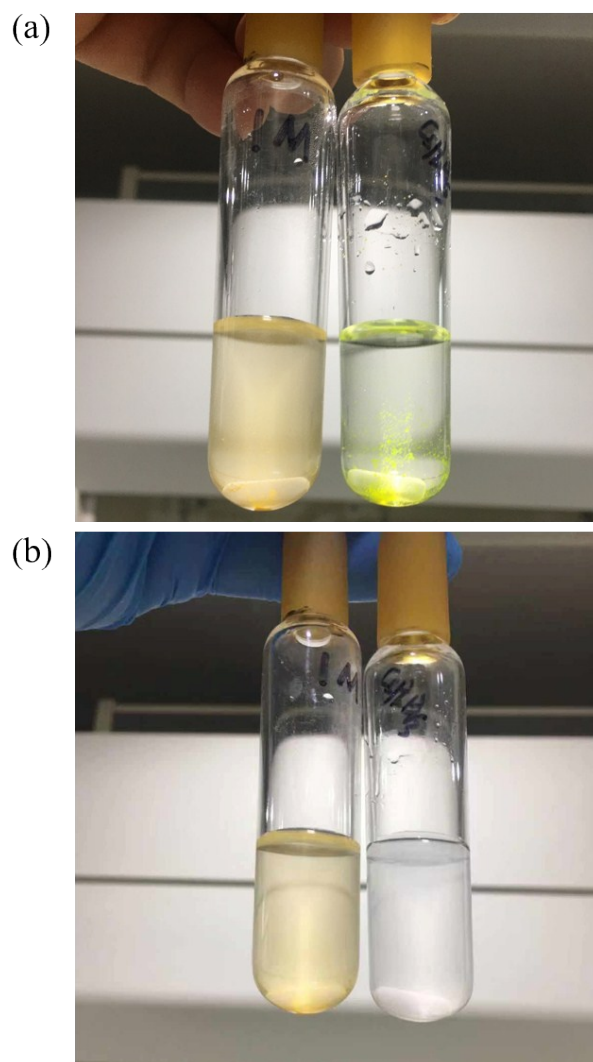

**Fig. S8** Comparison before (a) and after (b) the photocatalytic experiments (left: PNC; right: pure  $\text{CsPbBr}_3$ ).

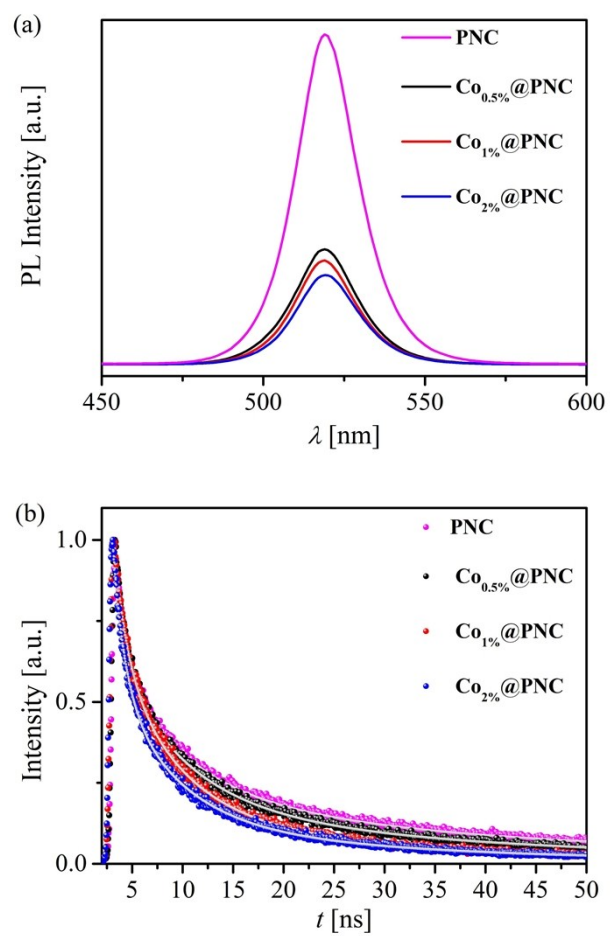

**Fig. S9** (a) Photoluminescence spectra and (b) Time-resolved photoluminescence decays of PNC and Co@PNC with various doping concentrations.

**Table S2** Multiexponential fit parameters for the decays of photoluminescence lifetime (Fig. S9b). Excitation wavelength: 400 nm; detection wavelength: 520 nm.<sup>a</sup>

| sample                  | $\tau_1$ (ns)<br>( $A_1$ ) | $\tau_2$ (ns)<br>( $A_2$ ) | $\tau_3$ (ns)<br>( $A_3$ ) | $\tau_{Ave}$ (ns) |
|-------------------------|----------------------------|----------------------------|----------------------------|-------------------|
| PNC                     | 1.03<br>(3.46%)            | 6.50<br>(26.84%)           | 30.14<br>(69.70%)          | 22.78             |
| Co <sub>0.5%</sub> @PNC | 1.05<br>(4.43%)            | 6.57<br>(33.55%)           | 27.93<br>(62.02%)          | 19.57             |
| Co <sub>1%</sub> @PNC   | 1.04<br>(3.86%)            | 5.95<br>(36.84%)           | 24.92<br>(55.20%)          | 16.08             |
| Co <sub>2%</sub> @PNC   | 1.03<br>(6.81%)            | 5.80<br>(38.52%)           | 22.39<br>(54.67%)          | 14.54             |

<sup>a</sup>  $A_1+A_2+A_3=1$ ; The calculation formula of average lifetime  $\tau_{Ave} = \sum \tau_i * A_i$ .

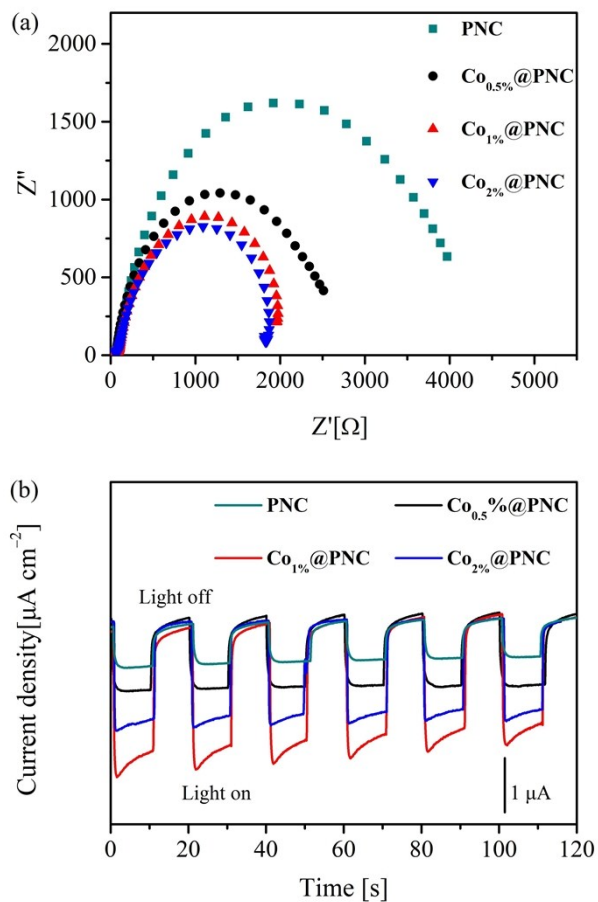

**Fig. S10** (a) EIS Nyquist plots of PNC and Co@PNC with various doping concentrations measured under dark. (b)  $I-t$  curves of PNC and Co@PNC with various doping concentrations plotted at a bias potential of  $-0.4$  V (vs. Ag/AgCl) under light illumination ( $100 \text{ mW cm}^{-2}$ ).

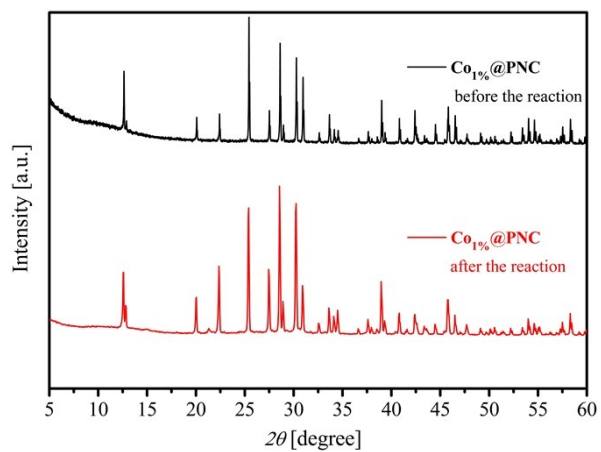

**Fig. S11** XRD patterns of Co<sub>1%</sub>@PNC before (black) and after (red) the photocatalytic reaction.



**Table S3** Results of control experiments for the photocatalytic reaction.

| Entry            | Photocatalyst                                       | Gas Products                        | Liquid Products                         |
|------------------|-----------------------------------------------------|-------------------------------------|-----------------------------------------|
|                  |                                                     | $n_{\text{CO}}$ [ $\mu\text{mol}$ ] | $n_{\text{HCOO}^-}$ [ $\mu\text{mol}$ ] |
| 1                | Co <sub>1%</sub> @PNC                               | 7.28                                | 3.44                                    |
| 2 <sup>[a]</sup> | 0                                                   | 0                                   | 0                                       |
| 3 <sup>[b]</sup> | Co <sub>1%</sub> @PNC                               | 0                                   | 0                                       |
| 4 <sup>[c]</sup> | Co <sub>1%</sub> @PNC                               | trace                               | 0.13                                    |
| 5 <sup>[d]</sup> | Co <sub>1%</sub> @PNC                               | 0.58                                | 0                                       |
| 6 <sup>[e]</sup> | PNC                                                 | 1.48                                | ---                                     |
| 7 <sup>[f]</sup> | Co <sub>1%</sub> @PNC                               | 3.02                                | ---                                     |
| 8                | Cs <sub>4</sub> PbBr <sub>6</sub>                   | 0                                   | 0                                       |
| 9                | Co <sub>1%</sub> @Cs <sub>4</sub> PbBr <sub>6</sub> | 0                                   | 0                                       |

Reaction conditions: 4 mg photocatalysts were added into the mixture CO<sub>2</sub>-saturated solution of acetonitrile (5 mL), H<sub>2</sub>O (15  $\mu\text{L}$ ) and methanol (15  $\mu\text{L}$ ) under 300 W Xe-lamp irradiation with the light intensity of 100 mW cm<sup>-2</sup>. Irradiation time: 15 h. [a] Entry 2: without Co<sub>1%</sub>@PNC photocatalyst. [b] Entry 3: without light. [c] Entry 4: 100% Ar. [d] Entry 5: without methanol. [e] and [f] Entry 6 and 7: methanol replaced with benzyl alcohol.

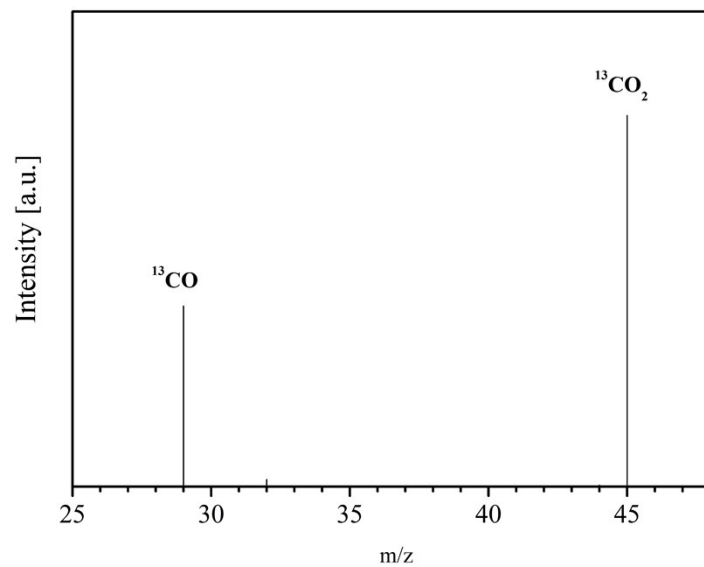

**Fig. S12** Gas chromatogram and mass spectra (GC-MS) analysis for solar-driven reduction of  $^{13}\text{CO}_2$  to  $^{13}\text{CO}$  ( $m/z = 29$ ) with  $\text{Co}_{1\%}\text{@PNC}$  as photocatalyst.



## Reference

- S1 J. Li, L. Xu, T. Wang, J. Song, J. Chen, J. Xue, Y. Dong, B. Cai, Q. Shan, B. Han and H. Zeng, *Adv. Mater.*, 2017, **29**, 1603885.
- S2 G. Kaur, K. J. Babu, N. Ghorai, T. Goswami, S. Maiti and H. N. Ghosh, *J. Phys. Chem. Lett.*, 2019, **10**, 5302–5311.
- S3 A. Call, M. Cibian, K. Yamamoto, T. Nakazono, K. Yamauchi and K. Sakai, *ACS Catal.*, 2019, **9**, 4867–4874.
- S4 W. Wu, K. Ding, J. Liu, T Drake, P. Stair and E. Weitz, *J. Phys. Chem. C*, 2017, **121**, 26794–26805.
